# Supplementary material for: Seasonal variation and spatial distribution of carbonaceous aerosols in Taiwan
Source: Copernicus journal article supplement (doi:10.5194/acp-10-9563-2010), 2010-10-11
Supplement: Supplementary file [file acp-10-9563-2010-supplement.pdf]

Table S1. Intercomparison of POC and SOC concentrations of PM<sub>10</sub> calculated using two independent approaches for (OC/EC)<sub>primary</sub> derivation.

| Station        | Season | Model 1 <sup>a</sup>                            |         |                  |                  | Model 1 <sup>a,b</sup>                          |         |                  |                  | Model 2 <sup>c</sup>                                |                  |                  |
|----------------|--------|-------------------------------------------------|---------|------------------|------------------|-------------------------------------------------|---------|------------------|------------------|-----------------------------------------------------|------------------|------------------|
|                |        | (OC) <sub>primary</sub> = $\alpha$ *EC+ $\beta$ |         |                  |                  | (OC) <sub>primary</sub> = $\alpha$ *EC+ $\beta$ |         |                  |                  | (OC) <sub>primary</sub> =(OC/EC) <sub>min</sub> *EC |                  |                  |
|                |        | [with season-independent parameters]            |         |                  |                  | [with season-specific parameters]               |         |                  |                  | (OC/EC) <sub>min</sub>                              | POC <sup>d</sup> | SOC <sup>d</sup> |
|                |        | $\alpha$                                        | $\beta$ | POC <sup>d</sup> | SOC <sup>d</sup> | $\alpha$                                        | $\beta$ | POC <sup>d</sup> | SOC <sup>d</sup> | (OC/EC) <sub>min</sub>                              | POC <sup>d</sup> | SOC <sup>d</sup> |
| Cape<br>FuGuei | Spring | 1.62                                            | 0.05    | 2.8(0.2)         | 2.2(0.1)         | 1.77                                            | -0.37   | 2.7(0.2)         | 2.3(0.1)         | 1.48                                                | 2.5(0.2)         | 2.5(0.1)         |
|                | Summer |                                                 |         | 2.7(0.1)         | 2.4(0.2)         | 1.25                                            | 0.53    | 2.6(0.1)         | 2.5(0.2)         | 1.18                                                | 1.9(0.1)         | 3.1(0.2)         |
|                | Autumn |                                                 |         | 1.8(0.2)         | 1.5(0.2)         | 1.48                                            | 0.28    | 1.9(0.2)         | 1.4(0.2)         | 1.42                                                | 1.6(0.2)         | 1.7(0.2)         |
|                | Winter |                                                 |         | 2.7(0.2)         | 2.9(0.2)         | 1.48                                            | 1.04    | 3.4(0.2)         | 2.2(0.2)         | 1.48                                                | 2.4(0.2)         | 3.1(0.2)         |
| Taipei         | Spring | 1.70                                            | 0.46    | 6.7(0.3)         | 2.2(0.2)         | 2.10                                            | -0.96   | 6.7(0.3)         | 2.2(0.2)         | 1.48                                                | 5.4(0.2)         | 3.5(0.2)         |
|                | Summer |                                                 |         | 5.7(0.3)         | 2.6(0.3)         | ---                                             | ---     | ---              | ---              | 1.54                                                | 4.7(0.3)         | 3.5(0.3)         |
|                | Autumn |                                                 |         | 4.2(0.3)         | 1.5(0.2)         | ---                                             | ---     | ---              | ---              | 1.73                                                | 3.8(0.3)         | 1.9(0.2)         |
|                | Winter |                                                 |         | 5.6(0.4)         | 2.8(0.4)         | ---                                             | ---     | ---              | ---              | 1.96                                                | 5.9(0.5)         | 2.4(0.4)         |
| Taichung       | Spring | 1.43                                            | 2.88    | 8.4(0.3)         | 3.1(0.3)         | 1.40                                            | 2.65    | 8.1(0.3)         | 3.4(0.3)         | 1.66                                                | 6.4(0.3)         | 5.3(0.3)         |
|                | Summer |                                                 |         | 7.3(0.5)         | 4.6(0.7)         | ---                                             | ---     | ---              | ---              | 1.58                                                | 4.8(0.5)         | 6.9(0.7)         |
|                | Autumn |                                                 |         | 9.5(0.5)         | 3.9(0.6)         | 1.32                                            | 3.39    | 9.5(0.4)         | 3.9(0.6)         | 1.36                                                | 6.3(0.4)         | 7.0(0.6)         |
|                | Winter |                                                 |         | 9.7(0.4)         | 3.8(0.5)         | 2.03                                            | 0.02    | 9.7(0.6)         | 3.8(0.4)         | 1.84                                                | 8.7(0.5)         | 4.7(0.4)         |
| Tainan         | Spring | 1.56                                            | 3.54    | 8.9(0.3)         | 1.1(0.2)         | ---                                             | ---     | ---              | ---              | 2.13                                                | 7.3(0.4)         | 2.6(0.2)         |
|                | Summer |                                                 |         | 6.3(0.3)         | 1.3(0.3)         | ---                                             | ---     | ---              | ---              | 2.76                                                | 4.9(0.5)         | 2.5(0.3)         |
|                | Autumn |                                                 |         | 8.4(0.3)         | 2.6(0.4)         | ---                                             | ---     | ---              | ---              | 1.80                                                | 5.6(0.3)         | 5.4(0.4)         |
|                | Winter |                                                 |         | 9.2(0.5)         | 2.6(0.4)         | ---                                             | ---     | ---              | ---              | 2.15                                                | 7.8(0.7)         | 3.9(0.4)         |
| Pingtung       | Spring | 1.85                                            | 4.77    | 9.7(0.3)         | 3.4(0.3)         | ---                                             | ---     | ---              | ---              | 2.60                                                | 7.0(0.4)         | 6.1(0.4)         |
|                | Summer |                                                 |         | 7.5(0.4)         | 4.6(0.9)         | ---                                             | ---     | ---              | ---              | 3.84                                                | 5.6(0.8)         | 6.4(1.0)         |
|                | Autumn |                                                 |         | 9.9(0.3)         | 3.6(0.8)         | ---                                             | ---     | ---              | ---              | 2.98                                                | 8.3(0.5)         | 5.0(0.8)         |
|                | Winter |                                                 |         | 10.3(0.4)        | 3.1(0.3)         | ---                                             | ---     | ---              | ---              | 2.15                                                | 6.4(0.5)         | 6.9(0.4)         |
| Penghu         | Spring | 1.75                                            | 0.29    | 1.9(0.1)         | 1.3(0.2)         | 1.52                                            | 0.52    | 1.9(0.1)         | 1.3(0.2)         | 1.46                                                | 1.3(0.1)         | 1.8(0.2)         |
|                | Summer |                                                 |         | 1.5(0.1)         | 2.1(0.2)         | 1.85                                            | 0.77    | 2.1(0.1)         | 1.5(0.2)         | 1.68                                                | 1.2(0.1)         | 2.4(0.2)         |
|                | Autumn |                                                 |         | 1.7(0.1)         | 1.6(0.1)         | 2.14                                            | 0.06    | 1.8(0.2)         | 1.5(0.1)         | 1.91                                                | 1.5(0.2)         | 1.7(0.1)         |
|                | Winter |                                                 |         | 2.1(0.1)         | 1.3(0.1)         | 1.66                                            | 0.30    | 2.0(0.1)         | 1.4(0.1)         | 1.62                                                | 1.7(0.1)         | 1.8(0.1)         |
| Hualien        | Spring | 2.36                                            | -0.13   | 3.7(0.2)         | 2.3(0.1)         | 1.90                                            | 1.33    | 4.4(0.2)         | 1.6(0.1)         | 1.94                                                | 3.2(0.2)         | 2.8(0.1)         |
|                | Summer |                                                 |         | 3.5(0.1)         | 2.9(0.3)         | ---                                             | ---     | ---              | ---              | 2.12                                                | 3.2(0.1)         | 3.1(0.3)         |
|                | Autumn |                                                 |         | 3.4(0.2)         | 2.3(0.1)         | 2.21                                            | 0.48    | 3.8(0.2)         | 1.9(0.1)         | 2.00                                                | 3.0(0.2)         | 2.7(0.1)         |
|                | Winter |                                                 |         | 4.8(0.3)         | 2.0(0.2)         | 2.41                                            | -0.54   | 4.5(0.3)         | 2.3(0.2)         | 2.00                                                | 4.2(0.3)         | 2.6(0.2)         |

a. The station-specific  $\alpha$  and  $\beta$  were derived from the measurements with lowest 10% (OC/EC) values. The details of this approach are described in the main text.

b. Applying to the cases with N>50.

c. This method assumes the minimal (OC/EC) ratio is representative to the primary (OC/EC).

d. The standard error of each mean value is noted in parentheses

Table S2. Intercomparison of POC and SOC concentrations of PM<sub>2.5</sub> calculated using two independent approaches for (OC/EC)<sub>primary</sub> derivation.

| Station        | Season | Model 1 <sup>a</sup>                            |         |                  |                  | Model 1 <sup>a,b</sup>                          |         |                  |                  | Model 2 <sup>c</sup>                                |                  |                  |
|----------------|--------|-------------------------------------------------|---------|------------------|------------------|-------------------------------------------------|---------|------------------|------------------|-----------------------------------------------------|------------------|------------------|
|                |        | (OC) <sub>primary</sub> = $\alpha$ *EC+ $\beta$ |         |                  |                  | (OC) <sub>primary</sub> = $\alpha$ *EC+ $\beta$ |         |                  |                  | (OC) <sub>primary</sub> =(OC/EC) <sub>min</sub> *EC |                  |                  |
|                |        | [with season-independent parameters]            |         |                  |                  | [with season-specific parameters]               |         |                  |                  | (OC/EC) <sub>min</sub>                              | POC <sup>d</sup> | SOC <sup>d</sup> |
|                |        | $\alpha$                                        | $\beta$ | POC <sup>d</sup> | SOC <sup>d</sup> | $\alpha$                                        | $\beta$ | POC <sup>d</sup> | SOC <sup>d</sup> | (OC/EC) <sub>min</sub>                              | POC <sup>d</sup> | SOC <sup>d</sup> |
| Cape<br>FuGuei | Spring | 1.73                                            | 0.04    | 2.6(0.2)         | 1.7(0.1)         | 2.02                                            | -0.29   | 2.7(0.2)         | 1.6(0.1)         | 1.63                                                | 2.4(0.2)         | 1.9(0.1)         |
|                | Summer |                                                 |         | 2.0(0.1)         | 1.5(0.1)         | 1.00                                            | 0.98    | 2.1(0.1)         | 1.4(0.1)         | 1.28                                                | 1.5(0.1)         | 2.0(0.1)         |
|                | Autumn |                                                 |         | 1.8(0.2)         | 1.1(0.1)         | 1.73                                            | -0.14   | 1.6(0.2)         | 1.3(0.1)         | 1.31                                                | 1.3(0.2)         | 1.5(0.1)         |
|                | Winter |                                                 |         | 2.4(0.2)         | 2.0(0.2)         | 1.47                                            | 0.70    | 2.7(0.1)         | 1.7(0.2)         | 1.53                                                | 2.1(0.2)         | 2.3(0.2)         |
| Taipei         | Spring | 1.78                                            | -0.76   | 5.3(0.2)         | 2.1(0.2)         | 1.67                                            | -0.07   | 5.6(0.2)         | 1.8(0.2)         | 1.51                                                | 5.1(0.2)         | 2.3(0.2)         |
|                | Summer |                                                 |         | 4.7(0.4)         | 2.2(0.3)         | ---                                             | ---     | ---              | ---              | 1.48                                                | 4.5(0.4)         | 2.4(0.3)         |
|                | Autumn |                                                 |         | 3.4(0.4)         | 1.7(0.2)         | ---                                             | ---     | ---              | ---              | 1.37                                                | 3.2(0.3)         | 1.8(0.2)         |
|                | Winter |                                                 |         | 3.8(0.4)         | 2.2(0.2)         | ---                                             | ---     | ---              | ---              | 1.64                                                | 4.2(0.4)         | 1.8(0.2)         |
| Taichung       | Spring | 1.63                                            | 0.07    | 5.7(0.3)         | 2.5(0.2)         | ---                                             | ---     | ---              | ---              | 1.26                                                | 4.3(0.2)         | 3.8(0.2)         |
|                | Summer |                                                 |         | 3.8(0.4)         | 4.9(0.8)         | ---                                             | ---     | ---              | ---              | 1.90                                                | 4.3(0.5)         | 4.3(0.8)         |
|                | Autumn |                                                 |         | 6.1(0.4)         | 3.3(0.4)         | 1.46                                            | 0.85    | 6.2(0.4)         | 3.2(0.5)         | 1.51                                                | 5.6(0.4)         | 3.8(0.5)         |
|                | Winter |                                                 |         | 7.5(0.5)         | 3.4(0.5)         | 1.35                                            | 1.36    | 7.5(0.4)         | 3.4(0.5)         | 1.44                                                | 6.6(0.5)         | 4.3(0.5)         |
| Tainan         | Spring | 2.01                                            | 0.04    | 5.9(0.4)         | 1.2(0.2)         | ---                                             | ---     | ---              | ---              | 1.75                                                | 5.1(0.4)         | 1.9(0.2)         |
|                | Summer |                                                 |         | 4.0(0.4)         | 2.2(0.1)         | ---                                             | ---     | ---              | ---              | 2.70                                                | 5.3(0.6)         | 0.9(0.2)         |
|                | Autumn |                                                 |         | 6.1(0.4)         | 2.9(0.4)         | ---                                             | ---     | ---              | ---              | 1.98                                                | 6.0(0.4)         | 3.0(0.4)         |
|                | Winter |                                                 |         | 5.2(0.7)         | 2.7(0.4)         | ---                                             | ---     | ---              | ---              | 2.27                                                | 5.8(0.8)         | 2.0(0.3)         |
| Pingtung       | Spring | 1.45                                            | 4.38    | 7.4(0.2)         | 2.0(0.3)         | ---                                             | ---     | ---              | ---              | 3.05                                                | 6.3(0.4)         | 3.1(0.3)         |
|                | Summer |                                                 |         | 6.3(0.2)         | 3.8(0.9)         | ---                                             | ---     | ---              | ---              | 4.49                                                | 6.1(0.7)         | 3.8(0.9)         |
|                | Autumn |                                                 |         | 7.6(0.3)         | 2.5(0.5)         | ---                                             | ---     | ---              | ---              | 2.68                                                | 6.0(0.5)         | 3.7(0.6)         |
|                | Winter |                                                 |         | 8.6(0.3)         | 3.3(0.4)         | ---                                             | ---     | ---              | ---              | 1.81                                                | 5.2(0.3)         | 6.6(0.4)         |
| Penghu         | Spring | 1.51                                            | 0.00    | 1.2(0.1)         | 0.9(0.1)         | 1.20                                            | 0.26    | 1.2(0.1)         | 0.9(0.1)         | 1.12                                                | 0.9(0.1)         | 1.2(0.1)         |
|                | Summer |                                                 |         | 0.9(0.1)         | 1.1(0.1)         | ---                                             | ---     | ---              | ---              | 1.13                                                | 0.7(0.1)         | 1.3(0.1)         |
|                | Autumn |                                                 |         | 1.1(0.1)         | 1.1(0.1)         | 1.87                                            | -0.10   | 1.2(0.1)         | 1.0(0.1)         | 1.54                                                | 1.1(0.1)         | 1.1(0.1)         |
|                | Winter |                                                 |         | 1.4(0.1)         | 1.0(0.1)         | 1.26                                            | 0.42    | 1.6(0.1)         | 0.8(0.1)         | 1.41                                                | 1.3(0.1)         | 1.1(0.1)         |
| Hualien        | Spring | 1.90                                            | -0.17   | 2.8(0.1)         | 1.2(0.1)         | 1.31                                            | 0.80    | 2.9(0.1)         | 1.1(0.1)         | 1.53                                                | 2.4(0.1)         | 1.6(0.1)         |
|                | Summer |                                                 |         | 2.1(0.1)         | 1.5(0.2)         | ---                                             | ---     | ---              | ---              | 1.57                                                | 1.8(0.1)         | 1.7(0.2)         |
|                | Autumn |                                                 |         | 2.2(0.2)         | 1.4(0.1)         | 1.94                                            | -0.17   | 2.2(0.2)         | 1.4(0.1)         | 1.55                                                | 2.0(0.2)         | 1.7(0.1)         |
|                | Winter |                                                 |         | 3.4(0.2)         | 1.9(0.2)         | 2.20                                            | -0.29   | 3.8(0.3)         | 1.4(0.2)         | 2.07                                                | 3.8(0.3)         | 1.4(0.2)         |

a. The station-specific  $\alpha$  and  $\beta$  were derived from the measurements with lowest 10% (OC/EC) values. The details of this approach are described in the main text.

b. Applying to the cases with N>50.

c. This method assumes the minimal (OC/EC) ratio is representative to the primary (OC/EC).

d. The standard error of each mean value is noted in parentheses

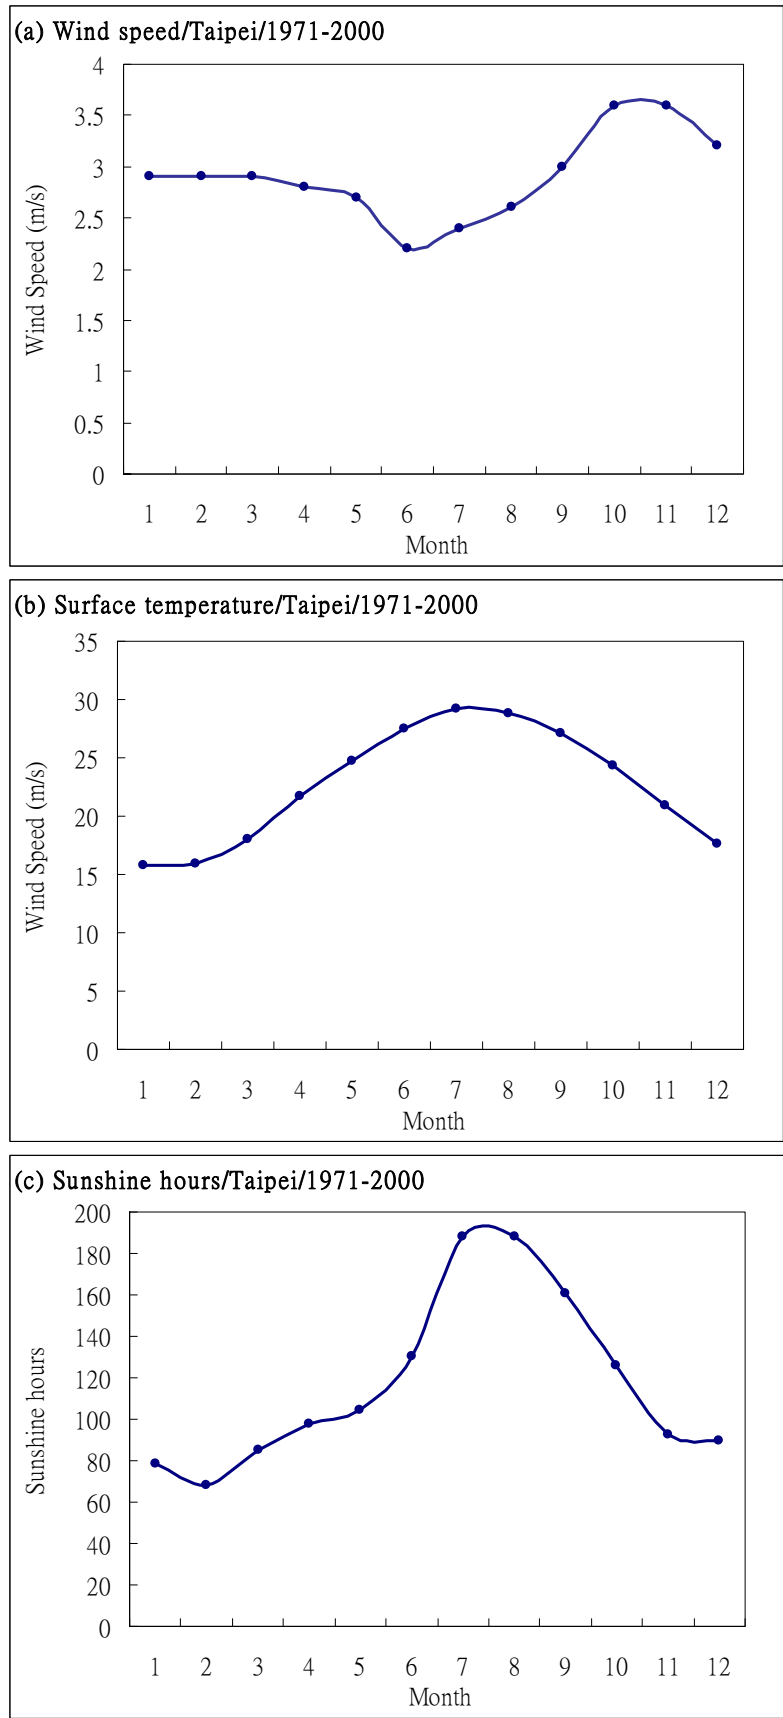

Figure S1. Climatology of meteorological parameters in Taipei, Taiwan.  
 (source: Central Weather Bureau, Taiwan)
